# Supplementary material
Source: PubMed Central journal article supplement (PMC1635763)
Supplement: cmaj_175_11_1377__1.pdf [file cmaj_175_11_1377__1.pdf]

**Appendix 1: Scoring criteria for the Sequential Organ-Failure Assessment (SOFA) score\***

| Variable                                   | Score         |                   |                   |                                      |                                       |
|--------------------------------------------|---------------|-------------------|-------------------|--------------------------------------|---------------------------------------|
|                                            | 0             | 1                 | 2                 | 3                                    | 4                                     |
| PaO <sub>2</sub> /FIO <sub>2</sub> , mm Hg | > 400         | ≤ 400             | ≤ 300             | ≤ 200                                | ≤ 100                                 |
| Platelet count, × 10 <sup>6</sup> /L       | > 150         | ≤ 150             | ≤ 100             | ≤ 50                                 | ≤ 20                                  |
| Bilirubin level, mg/dL (μmol/L)            | < 1.2 (< 20)  | 1.2-1.9 (20-32)   | 2.0-5.9 (33-100)  | 6.0-11.9 (101-203)                   | > 12 (> 203)                          |
| Hypotension†                               | None          | MABP < 70         | Dop ≤ 5           | Dop > 5<br>Epi ≤ 0.1<br>Norepi ≤ 0.1 | Dop > 15<br>Epi > 0.1<br>Norepi > 0.1 |
| Glasgow Coma score                         | 15            | 13-14             | 10-12             | 6-9                                  | < 6                                   |
| Creatinine level, mg/dL (μmol/L)           | < 1.2 (< 106) | 1.2-1.9 (106-168) | 2.0-3.4 (169-300) | 3.5-4.9 (301-433)                    | > 5 (> 434)                           |

Note: PaO<sub>2</sub> = partial pressure of arterial oxygen; FIO<sub>2</sub> = fraction of inspired oxygen; MABP = mean arterial blood pressure, in mm Hg;

\*Adapted, with permission, from Ferreira FL, Bota DP, Bross A, et al. Serial evaluation of the SOFA score to predict outcome in critically ill patients. *JAMA* 2001;286:1754-8. Copyright © 2001, American Medical Association. All rights reserved.

†Dop (dopamine), epi (epinephrine) and norepi (norepinephrine) doses in μg/kg per min.
