# Supplementary material
Source: PubMed Central journal article supplement (PMC1635763)
Supplement: cmaj_175_11_1377__2.pdf [file cmaj_175_11_1377__2.pdf]

## Appendix 2: Prioritization tool used in triage protocol for the assessment of patients' needs for critical care during an influenza pandemic.

### Initial assessment

| Triage code | Criteria                                   | Action or priority                                                                                                                                        |
|-------------|--------------------------------------------|-----------------------------------------------------------------------------------------------------------------------------------------------------------|
| Blue        | Exclusion criteria met or SOFA score > 11* | <ul style="list-style-type: none"> <li>• Manage medically</li> <li>• Provide palliative care as needed</li> <li>• Discharge from critical care</li> </ul> |
| Red         | SOFA score ≤ 7 or single-organ failure     | Highest priority                                                                                                                                          |
| Yellow      | SOFA score 8–11                            | Intermediate priority                                                                                                                                     |
| Green       | No significant organ failure               | <ul style="list-style-type: none"> <li>• Defer or discharge</li> <li>• Reassess as needed</li> </ul>                                                      |

### 48-hour assessment

| Triage code | Criteria                                                                              | Action or priority                                                                                                  |
|-------------|---------------------------------------------------------------------------------------|---------------------------------------------------------------------------------------------------------------------|
| Blue        | Exclusion criteria met or SOFA score > 11 or SOFA score stable at 8–11 with no change | <ul style="list-style-type: none"> <li>• Provide palliative care</li> <li>• Discharge from critical care</li> </ul> |
| Red         | SOFA score < 11 and decreasing                                                        | Highest priority                                                                                                    |
| Yellow      | SOFA score stable at < 8 with no change                                               | Intermediate priority                                                                                               |
| Green       | No longer dependant on ventilator                                                     | • Discharge from critical care                                                                                      |

### 120-hour assessment

| Triage code | Criteria                                                                    | Action or priority                                                                                                  |
|-------------|-----------------------------------------------------------------------------|---------------------------------------------------------------------------------------------------------------------|
| Blue        | Exclusion criteria met or SOFA score > 11 or SOFA score < 8 with no change† | <ul style="list-style-type: none"> <li>• Provide palliative care</li> <li>• Discharge from critical care</li> </ul> |
| Red         | SOFA < 11 and decreasing progressively                                      | Highest priority                                                                                                    |
| Yellow      | SOFA < 8 with minimal decrease (< 3-point decrease in past 72 h)            | Intermediate priority                                                                                               |
| Green       | No longer dependant on ventilator                                           | • Discharge from critical care                                                                                      |

Note: SOFA = Sequential Organ-Failure Assessment (see Appendix 1, available at [www.cmaj.ca/cgi/content/full/175/11/1377/DC1](http://www.cmaj.ca/cgi/content/full/175/11/1377/DC1)).  
 \*If an exclusion criterion is met or the SOFA score is > 11 anytime from the initial assessment to 48 hours afterward, change the triage code to Blue and proceed as indicated.  
 †If an exclusion criterion is met or the SOFA score is > 11 anytime from 48 to 120 hours afterward, change the triage code to Blue and proceed as indicated.
